# Supplementary material
Source: publisher site journal article supplement (https://www.dovepress.com/get_supplementary_file.php?f=273755.docx)
Supplement: Supplementary file 1 [file get_supplementary_file.php]

**Appendix A:** Survey items

Gender

1. Male
2. Female

Age: _______

1. 18–25
2. 26–35
3. 36–45
4. 46–55
5. 56–65
6. 65+

In the past week, you were mainly

1. Working from home
2. Going to work in the office
3. Not working because of the epidemic (you still are in employment)
4. Unemployed (Do not have a job before and during the epidemic)

Do you have a chronic medical issue?

1. Yes
2. Not sure
3. No

In the past week, how many hours do you exercise daily on average? _____ hours

1. Zero, 0
2. 1 hour
3. 2 hours
4. 3 hours
5. 4 hours and more

Have you been infected with coronavirus?

1. Yes
2. Not sure
3. No

What is the number of full-time employees in your company? ____

1. 0–50
2. 51–200
3. 201–500
4. 501–1000
5. 1000+

**Depression and anxiety (PHQ-4)**

| Over the last 2 weeks, how often have you been bothered by the following problems? | Not  at all | Several days | More than half the days | Nearly every day |
| --- | --- | --- | --- | --- |
| Feeling nervous, anxious or on edge | 0 | 1 | 2 | 3 |
| Not being able to stop or control worrying | 0 | 1 | 2 | 3 |
| Little interest or pleasure in doing things | 0 | 1 | 2 | 3 |
| Feeling down, depressed, or hopeless | 0 | 1 | 2 | 3 |

**Notes:** Kroenke, K., Spitzer, R. L., Williams, J. B., & Löwe, B. (2009). An ultra-brief screening scale for anxiety and depression: the PHQ–4. Psychosomatics, 50(6), 613-621.

Appendix B:

**Checklist for Reporting Results of Internet E-Surveys (CHERRIES)**

| ***Checklist Item*** | ***Explanation*** |
| --- | --- |
| Describe survey design | **521 adults on April 1-10, 2020 in Iran during COVID-19 pandemic, using connivance sampling method** |
| IRB approval | **The survey was approved (IR.SSRI.REC.1389.685) by the ethics committee of Shahid Rejaee University in Iran** |
| Informed consent | **In the cover page of the online survey, informed consent has been obtained from each participant.** |
| Data protection | **Participation was entirely voluntary and anonymous, and we didn’t ask for any personal information of participants.** |
| Development and testing | **A well-established measurement scales has been adopted for measuring the main variables of the study.**  **Before launching the final survey, the usability and technical functionality of the online survey had been tested.** |
| Open survey versus closed survey | **We have used an “open survey” for collecting data** |
| Contact mode | **On the target social media we have made the initial contact with the potential participants.** |
| Advertising the survey | **We distributed the survey through social media (Telegram, Instagram and WhatsApp)** |
| Web/E-mail | **The online survey sent out through social media** |
| Context | **The survey has been distributed through social media (Telegram, Instagram and WhatsApp). The Iranian adults are mainly visitors of these social media.** |
| Mandatory/voluntary | **The participation in the study was fully voluntary, but, answering all item of the survey was mandatory.** |
| Incentives | **We didn’t offer any incentive, only for those participants who provide us their contact information, we promise to provide the study major.** |
| Time/Date | **On April 1-10, 2020** |
| Randomization of items or questionnaires | **Due to have a short survey, we are unable to randomize or alternate the items.** |
| Adaptive questioning | **The survey was very short and the items were very simple to understand. According to the pilot test before launching the final survey, we didn’t have any complicated items.** |
| Number of Items | **In total, our online survey had 10 questions** |
| Number of screens (pages) | **1 page** |
| Completeness check | **Despite having a short survey, for the Likert scale items we provide a non-response option such as “not applicable” or “rather not say”.** |
| Review step | **After submitting the online survey, the respondents were unable to review and change their answers** |
| Unique site visitor | **Due to not using IP addresses or cookies, we were unable to know the exact view rates of the survey.** |
| View rate (Ratio of unique survey visitors/unique site visitors) | **Due to not using IP addresses or cookies, we were unable to count unique visitors to the first page of the survey** |
| Participation rate (Ratio of unique visitors who agreed to participate/unique first survey page visitors) | **Due to not using IP addresses or cookies, we were unable to count “recruitment” rate of the survey** |
| Completion rate (Ratio of users who finished the survey/users who agreed to participate) | **Our survey had only one page, therefore the number of people submitting the last questionnaire page, we equal to the number of people who agreed to participate (or submitted the first survey page).** |
| Cookies used | **The cookies weren’t used to assign a unique user identifier to each client computer.** |
| IP check | **The IP address of the client computer wasn’t used to identify potential duplicate entries from the same, in the cover letter of the survey, we informed them that, they arenot allowed to submit one than one responses.** |
| Log file analysis | **We didn’t use any other techniques to analyze the log file for identification of multiple entries.** |
| Registration | **We have used an “open survey” for collecting data, registration wasn’t needed for filling out the survey** |
| Handling of incomplete questionnaires | **We had a very short questionnaire; therefore, we made answering all items mandatory for the participants. So, in the final analysis, we didn’t have any incomplete survey.** |
| Questionnaires submitted with an atypical timestamp | **In the online survey through social media, we were unable to measure the time people needed to fill in a questionnaire.** |
| Statistical correction | **We didn’t use any methods such as weighting of items or propensity scores to adjust for the non-representative sample.** |

**Notes:** Eysenbach G. Improving the quality of Web surveys: the Checklist for Reporting Results of Internet E-Surveys (CHERRIES). *J Med Internet Res*. 2004;29;6(3):e34.
